# Supplementary material for: Primary Human Hepatocyte Spheroids as Tools to Study the Hepatotoxic Potential of Non-Pharmaceutical Chemicals
Source: MDPI journal article supplement (doi:10.3390/ijms222011005), 2021-10-12
Supplement: s1 [file s1]

# Primary Human Hepatocyte Spheroids as Tools to Study the Hepatotoxic Potential of Non-Pharmaceutical Chemicals

Vânia Vilas-Boas <sup>1,†,‡</sup>, Eva Gijbels <sup>1,†</sup>, Kaat Leroy <sup>1</sup>, Alanah Pieters <sup>1</sup>, Audrey Baze <sup>2</sup>, Céline Parmentier <sup>2</sup> and Mathieu Vinken <sup>1,\*</sup>

<sup>1</sup> Entity of In Vitro Toxicology and Dermato-Cosmetology, Vrije Universiteit Brussel, 1090 Brussels, Belgium;  
vfevilasboas@gmail.com (V.V.-B.); eva.anne.gijbels@vub.be (E.G.); kaat.leroy@vub.be (K.L.); alanah.pieters@vub.be (A.P.)

<sup>2</sup> KaLy-Cell, 67115 Plobsheim, France; a.baze@kaly-cell.com (A.B.);  
c.parmentier@kaly-cell.com (C.P.)

\* Correspondence: mathieu.vinken@vub.be

† These authors contributed equally to this work.

‡ Current affiliation: International Iberian Nanotechnology Laboratory, 4715-330 Braga, Portugal.

This file contains extra figures of the spheroids from the different primary human hepatocyte donors included in the study and the expression of hepatocyte differentiation markers. Images supporting bile canaliculi functionality in the 3D model are also shown. Furthermore, it contains information on the cholestatic index calculated for growing concentrations of bosentan (BOS) and macitentan (MAC) at distinct time-points, as well as the representation of the synergistic effects, or their lack, observed between the bile acid (BA) mixture and BOS or MAC. Finally, the names and functions of the genes mentioned in the manuscript are listed.

---

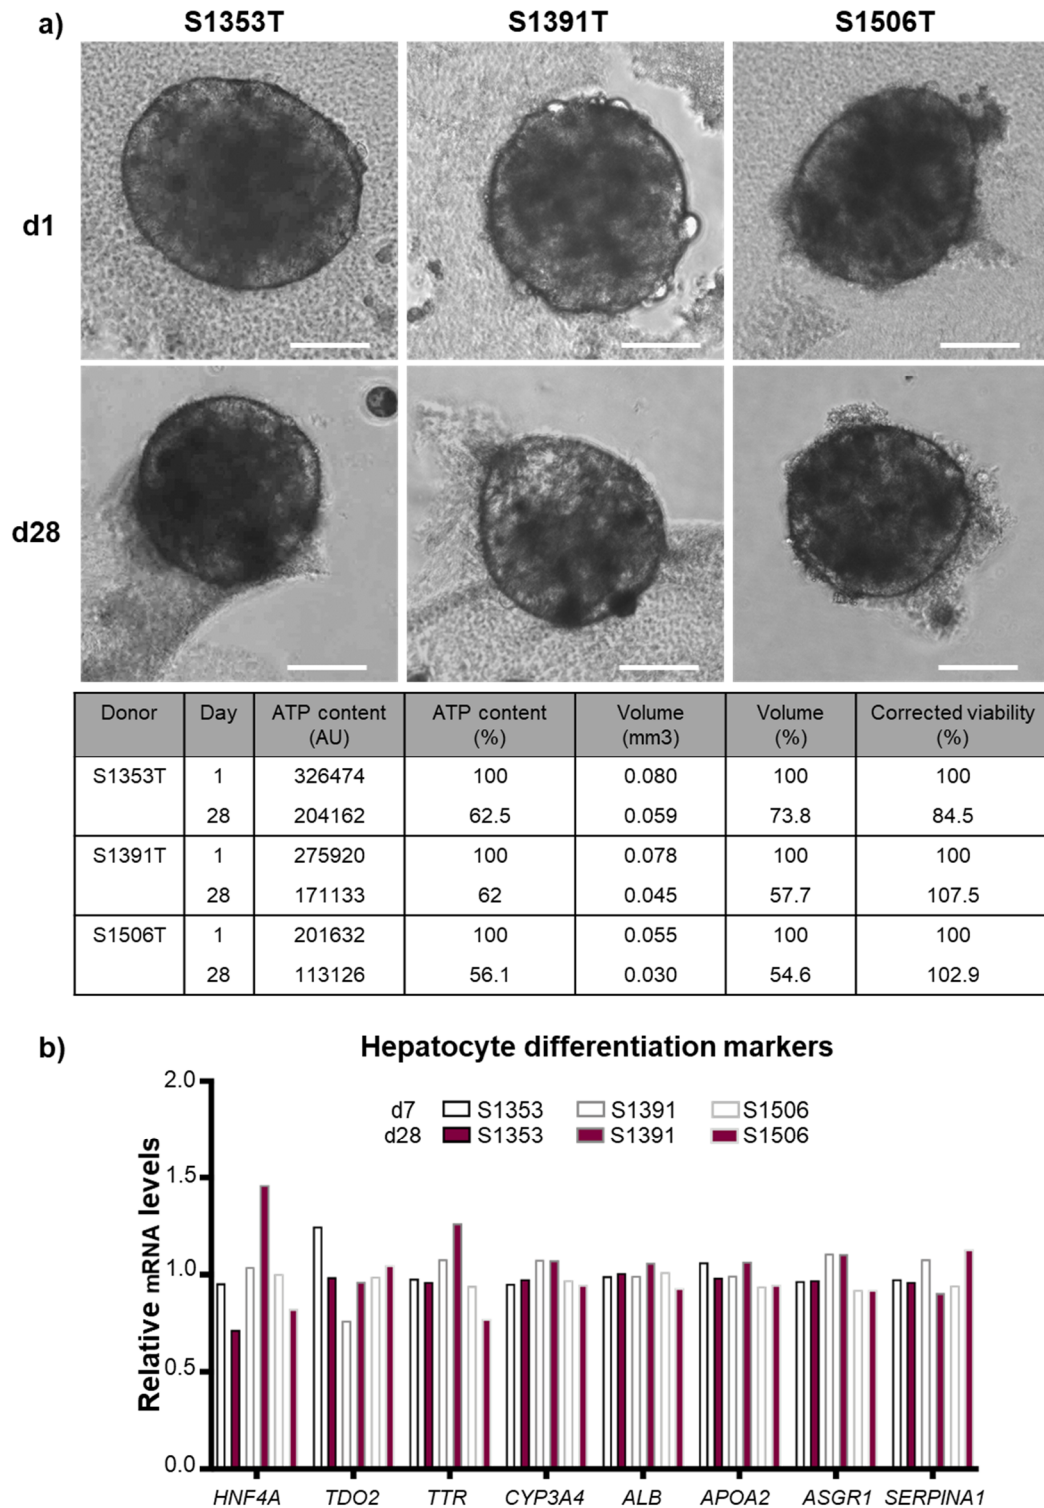

**Figure S1.** (a) Representative images of spheroids from different PHH donors, taken on day 1 and day 28 after exposure. Spheroids from different PHH donors look very similar and experience similar compaction rates throughout the time in culture. When corrected for spheroid compaction, as described in Bell et al., 2016 [1], cell viability is kept above 80% at day 28. Scale bar is 100  $\mu$ m. (b) Expression of genes involved in hepatocyte maturation and differentiation. Transcriptomic analysis revealed that the markers were stably expressed in the long-term cultures. HNF4A—hepatocyte nuclear factor 1 alpha; TDO2—tryptophan 2,3-deoxygenase; TTR—transferrin; CYP3A4—cytochrome P450 isoform 3A4; ALB—albumin; APOA2—apolipoprotein A2; ASGR1—asialoglycoprotein receptor 1; SERPINA1—alpha1-antitrypsin.

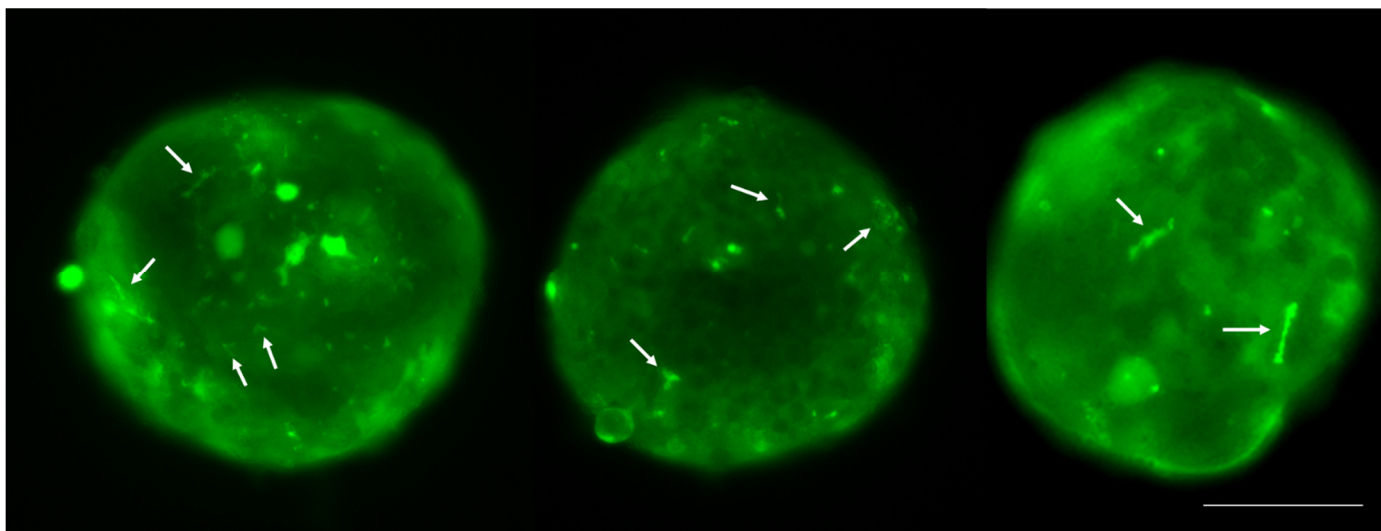

**Figure S2.** Primary human hepatocyte spheroids from donor S1506T stained with 5(6)-carboxy-2',7'-dichlorofluorescein diacetate (CDFDA) supporting that the bile canaliculi are functional in the 3D model. The probe is enzymatically metabolized by viable cells to a fluorescent compound that is then transported through the multidrug resistance-associated protein-2 to the bile canaliculi, allowing the visualization of canalicular structures (white arrows) inside the spheroids. Live control spheroids collected on day 7 were stained following a protocol previously established by Tostões et al., 2012 [2]. Scale bar is 100  $\mu$ m.

**Table S1.** Inter-donor variability regarding the effect of drug concentration and time of exposure on the cholestatic index values.

|        |         | BOSENTAN        |                 |                 |                 | MACITENTAN      |                 |                 |                 |
|--------|---------|-----------------|-----------------|-----------------|-----------------|-----------------|-----------------|-----------------|-----------------|
|        | $\mu$ M | 0.15            | 1.5             | 7.5             | 75              | 0.005           | 0.5             | 5               | 10              |
| S1353T | d1      | 1.06 $\pm$ 0.13 | 0.93 $\pm$ 0.01 | 1.01 $\pm$ 0.11 | 1.01 $\pm$ 0.11 | 1.06 $\pm$ 0.08 | 1.02 $\pm$ 0.13 | 1.06 $\pm$ 0.00 | 1.00 $\pm$ 0.05 |
|        | d7      | 0.94 $\pm$ 0.11 | 0.97 $\pm$ 0.05 | 1.00 $\pm$ 0.11 | 0.93 $\pm$ 0.02 | 0.92 $\pm$ 0.04 | 0.99 $\pm$ 0.04 | 0.98 $\pm$ 0.01 | 0.99 $\pm$ 0.01 |
|        | d14     | 0.95 $\pm$ 0.02 | 0.98 $\pm$ 0.08 | 1.03 $\pm$ 0.12 | 1.03 $\pm$ 0.25 | 1.02 $\pm$ 0.09 | 1.07 $\pm$ 0.04 | 1.11 $\pm$ 0.03 | 1.08 $\pm$ 0.08 |
|        | d21     | 1.01 $\pm$ 0.06 | 0.92 $\pm$ 0.13 | 1.12 $\pm$ 0.18 | 1.38 $\pm$ 0.08 | 0.96 $\pm$ 0.06 | 0.93 $\pm$ 0.10 | 1.15 $\pm$ 0.15 | 1.25 $\pm$ 0.05 |
|        | d28     | 0.87 $\pm$ 0.04 | 1.01 $\pm$ 0.03 | 1.03 $\pm$ 0.04 | 0.42 $\pm$ 0.24 | 0.99 $\pm$ 0.04 | 0.94 $\pm$ 0.18 | 1.07 $\pm$ 0.20 | 0.95 $\pm$ 0.01 |
| S1391T | d1      | 0.90 $\pm$ 0.24 | 1.00 $\pm$ 0.00 | 1.08 $\pm$ 0.05 | 0.91 $\pm$ 0.04 | 0.95 $\pm$ 0.07 | 0.93 $\pm$ 0.08 | 1.00 $\pm$ 0.13 | 0.94 $\pm$ 0.06 |
|        | d7      | 0.90 $\pm$ 0.11 | 0.87 $\pm$ 0.01 | 1.01 $\pm$ 0.16 | 0.92 $\pm$ 0.11 | 0.83 $\pm$ 0.01 | 0.92 $\pm$ 0.02 | 1.10 $\pm$ 0.11 | 1.09 $\pm$ 0.01 |
|        | d14     | 0.86 $\pm$ 0.06 | 0.90 $\pm$ 0.11 | 0.90 $\pm$ 0.09 | 1.1 $\pm$ 0.23  | 0.92 $\pm$ 0.14 | 0.95 $\pm$ 0.01 | 1.15 $\pm$ 0.25 | 1.10 $\pm$ 0.07 |
|        | d21     | 0.95 $\pm$ 0.18 | 1.04 $\pm$ 0.25 | 0.94 $\pm$ 0.04 | 0.70 $\pm$ 0.21 | 0.91 $\pm$ 0.31 | 0.79 $\pm$ 0.00 | 1.28 $\pm$ 0.25 | 1.20 $\pm$ 0.11 |
|        | d28     | 0.91 $\pm$ 0.06 | 1.06 $\pm$ 0.16 | 1.12 $\pm$ 0.30 | 1.12 $\pm$ 0.11 | 0.84 $\pm$ 0.01 | 0.75 $\pm$ 0.09 | 1.09 $\pm$ 0.14 | 1.05 $\pm$ 0.14 |
| S1506T | d1      | 1.02 $\pm$ 0.11 | 0.93 $\pm$ 0.06 | 0.98 $\pm$ 0.06 | 1.03 $\pm$ 0.04 | 1.09 $\pm$ 0.11 | 1.08 $\pm$ 0.03 | 0.96 $\pm$ 0.05 | 0.91 $\pm$ 0.06 |
|        | d7      | 1.12 $\pm$ 0.03 | 0.97 $\pm$ 0.07 | 1.27 $\pm$ 0.15 | 0.98 $\pm$ 0.22 | 1.09 $\pm$ 0.20 | 1.06 $\pm$ 0.24 | 1.18 $\pm$ 0.00 | 1.29 $\pm$ 0.08 |
|        | d14     | 1.18 $\pm$ 0.19 | 1.08 $\pm$ 0.01 | 1.26 $\pm$ 0.11 | 0.79 $\pm$ 0.20 | 1.23 $\pm$ 0.09 | 1.23 $\pm$ 0.06 | 1.38 $\pm$ 0.08 | 1.34 $\pm$ 0.21 |
|        | d21     | 1.08 $\pm$ 0.13 | 0.92 $\pm$ 0.07 | 2.34 $\pm$ 0.21 | 0.45 $\pm$ 0.14 | 1.06 $\pm$ 0.20 | 1.04 $\pm$ 0.08 | 1.24 $\pm$ 0.12 | 1.27 $\pm$ 0.06 |
|        | d28     | 0.90 $\pm$ 0.04 | 1.09 $\pm$ 0.07 | 4.27 $\pm$ 0.28 | 0.43 $\pm$ 0.19 | 0.86 $\pm$ 0.07 | 1.12 $\pm$ 0.23 | 1.12 $\pm$ 0.25 | 1.13 $\pm$ 0.16 |

Values were calculated for each of the test compounds, bosentan and macitentan, in 4 different concentrations in the presence and absence of concentrated BA mixture, at 5 consecutive time-points, for each of the 3 donors. Data represent mean  $\pm$  standard deviation values collected from at least 6 spheroids per condition. CIx values below 0.80 are highlighted in grey.

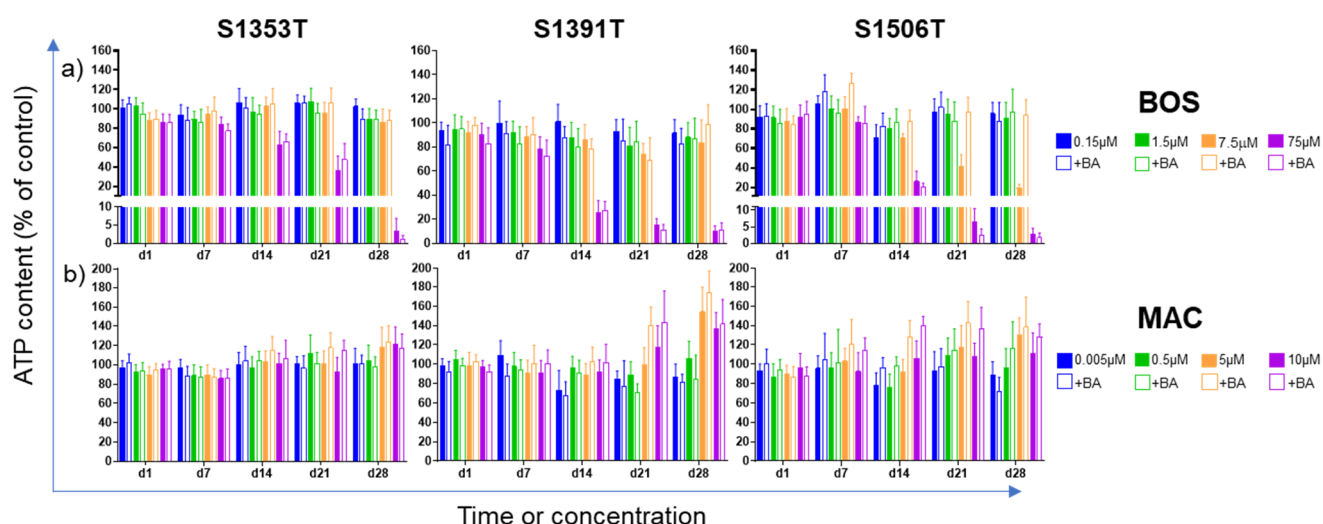

**Figure S3.** Effects of a concentrated BA mixture on the hepatotoxicity of the test compounds (a) bosentan and (b) macitentan throughout time. Spheroids from 3 different PHH donors were repeatedly incubated for 1, 7, 14, 21 and 28 days with the specified test compound in the presence (empty bars) and in the absence (filled bars) of a 30× concentrated mixture of BAs. At each predefined time-point, total ATP content was quantified. The effect of vehicle alone (control) was taken as 100%. Results are mean ± standard deviation of at least 6 spheroids per condition. ATP—adenosine triphosphate, BA—bile acid, BOS—bosentan, d—day, MAC—macitentan.

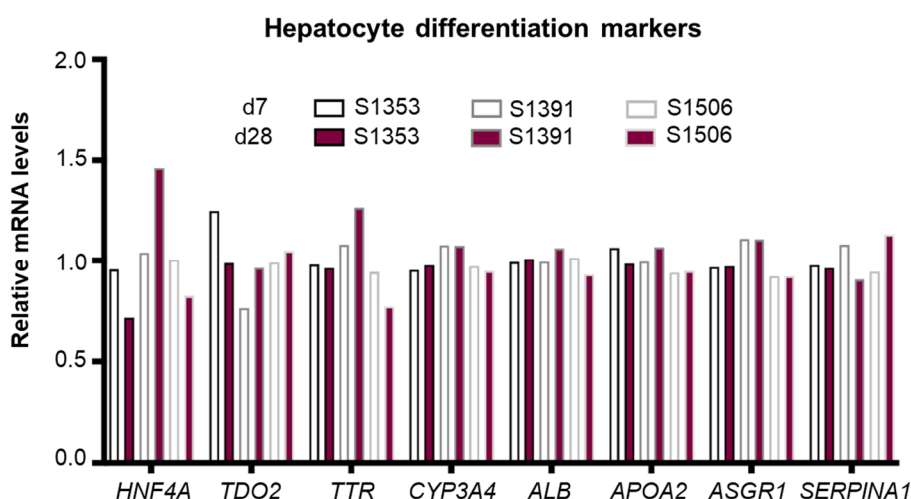

**Figure S4.** Expression of genes involved in hepatocyte maturation and differentiation. Transcriptomic analysis revealed that the markers were stably expressed in the long-term cultures. HNF4A—hepatocyte nuclear factor 1 alpha; TDO2—tryptophan 2,3-deoxygenase; TTR—transthyretin; CYP3A4—cytochrome P450 isoform 3A4; ALB—albumin; APOA2—apolipoprotein A2; ASGR1—asialoglycoprotein receptor 1; SERPINA1—alpha1-antitrypsin.

**Table S2.** Names and functions of the genes described in the analyses provided in the main manuscript.

| Figure Number * | Gene Abbreviation            | Gene Name                                                   | Relevant Associated Biological Pathways/Functions                                             |
|-----------------|------------------------------|-------------------------------------------------------------|-----------------------------------------------------------------------------------------------|
| 4b              | <i>CCR2</i>                  | C-C motif chemokine receptor 2                              | Inflammation                                                                                  |
|                 | <i>CSF1</i>                  | Colony stimulating factor 1                                 | Inflammation                                                                                  |
|                 | <i>IL1<math>\beta</math></i> | Interleukin 1 $\beta$                                       | Inflammation                                                                                  |
|                 | <i>IL1R1</i>                 | Interleukin 1 receptor 1                                    | Inflammation                                                                                  |
|                 | <i>MAPKAPK3</i>              | Mitogen-activated protein kinase-activated protein kinase 3 | Inflammation and oxidative stress                                                             |
|                 | <i>NLRP3</i>                 | NOD-, LRR- and pyrin domain-containing protein 3            | Inflammation                                                                                  |
|                 | <i>SERPINE1</i>              | Serpin E1                                                   | Inflammation                                                                                  |
|                 | <i>TLR3</i>                  | Toll like receptor 3                                        | Inflammation                                                                                  |
|                 | <i>TNFRSF9</i>               | Tumor necrosis factor receptor superfamily 9                | Adaptive immunity                                                                             |
|                 | <i>ATF4</i>                  | Activating transcription factor 4                           | Endoplasmic reticulum stress, amino acid starvation, mitochondrial stress or oxidative stress |
|                 | <i>ATF6</i>                  | Activating transcription factor 6                           | Unfolded protein response during endoplasmic reticulum stress                                 |
|                 | <i>DDIT3</i>                 | DNA damage inducible transcript 3                           | Endoplasmic reticulum stress                                                                  |
|                 | <i>HSPA5</i>                 | Heat shock protein A5                                       | Unfolded protein response during endoplasmic reticulum stress                                 |
|                 | <i>LY96</i>                  | Lymphocyte antigen 96                                       | Inflammation and apoptosis                                                                    |
|                 | <i>MAPK8</i>                 | Mitogen-activated protein kinase 8                          | Apoptosis                                                                                     |
|                 | <i>TLR4</i>                  | Toll like receptor 4                                        | Apoptosis                                                                                     |
|                 | <i>TJP2</i>                  | Tight junction protein 2                                    | Apoptosis                                                                                     |
|                 | <i>CASP3</i>                 | Caspase 3                                                   | Apoptosis                                                                                     |
|                 | <i>TP53</i>                  | Tumor protein 53                                            | Apoptosis                                                                                     |
|                 | <i>KRT18</i>                 | Keratin 18                                                  | Apoptosis and cytoskeletal signaling                                                          |
|                 | <i>FAS</i>                   | Fas cell surface death receptor                             | Apoptosis                                                                                     |
|                 | <i>TNFSF10</i>               | Tumor necrosis factor superfamily 10                        | Apoptosis                                                                                     |
|                 | <i>BAX</i>                   | BCL2 associated X, apoptosis regulator                      | Apoptosis                                                                                     |
|                 | <i>BCL2</i>                  | BCL2 apoptosis regulator                                    | Apoptosis                                                                                     |
|                 | <i>ATG7</i>                  | Autophagy related 7                                         | Autophagy                                                                                     |
|                 | <i>MAP1LC3B</i>              | Microtubule associated protein 1 light chain 3 $\beta$      | Autophagy                                                                                     |
|                 | <i>SH3GLB1</i>               | SH3 domain containing GRB2 like, endophilin B1              | Autophagy                                                                                     |
|                 | <i>SQSTM1</i>                | Sequestosome 1                                              | Autophagy                                                                                     |
|                 | <i>CYLD</i>                  | CYLD lysine 63 deubiquitinase                               | Necroptosis                                                                                   |
|                 | <i>MLKL</i>                  | Mixed lineage kinase domain like pseudokinase               | Necroptosis                                                                                   |
|                 | <i>RIPK1</i>                 | Receptor interacting protein kinase 1                       | Necroptosis                                                                                   |
|                 | <i>RIPK3</i>                 | Receptor interacting protein kinase 3                       | Necroptosis                                                                                   |
|                 | <i>ABCB11</i>                | Bile salt export pump (BSEP)                                | Apical transport of bile acids                                                                |
|                 | <i>ABCC2</i>                 | Multidrug resistance-associated protein 2                   | Apical transport of bile acids                                                                |
|                 | <i>ABCC3</i>                 | Multidrug resistance-associated protein 3                   | Alternative basolateral transport of bile acids                                               |
|                 | <i>ABCC4</i>                 | Multidrug resistance-associated protein 4                   | Alternative basolateral transport of bile acids                                               |
|                 | <i>CYP2B6</i>                | Cytochrome P450 2B6                                         | Drug and xenobiotic metabolism                                                                |
|                 | <i>CYP3A4</i>                | Cytochrome P450 3A4                                         | Drug metabolism                                                                               |
|                 | <i>CYP7A1</i>                | Cytochrome P450 7A1                                         | Bile acid synthesis                                                                           |

Table S2. *Cont.*

| Figure Number * | Gene Abbreviation             | Gene Name                                                | Relevant Associated Biological Pathways/Functions                                                                           |
|-----------------|-------------------------------|----------------------------------------------------------|-----------------------------------------------------------------------------------------------------------------------------|
| 4b              | <i>NR0B2</i>                  | Small heterodimer partner                                | Regulation/inhibition of other nuclear receptors                                                                            |
|                 | <i>NR1H4</i>                  | Farnesoid X receptor                                     | Bile acid homeostasis                                                                                                       |
|                 | <i>NR1I2</i>                  | Pregnane X receptor                                      | Regulator of genes involved in metabolism and secretion of xenobiotics, drugs and endogenous compounds (e.g., CYP3A4, MDR1) |
|                 | <i>NR1I3</i>                  | Constitutive androstane receptor                         | Regulator of genes involved in metabolism and secretion of xenobiotics, drugs and endogenous compounds (e.g., bilirubin)    |
|                 | <i>OATP1B1</i>                | Solute carrier organic anion transporter 1B1             | Transporter of endogenous compounds (e.g., bilirubin) and removal of drugs of hepatocytes                                   |
|                 | <i>OST<math>\alpha</math></i> | Organic solute transporter $\alpha$                      | Intestinal basolateral transporter of bile acids                                                                            |
|                 | <i>OST<math>\beta</math></i>  | Organic solute transporter $\beta$                       | Intestinal basolateral transporter of bile acids                                                                            |
|                 | <i>SLC10A1</i>                | Na <sup>+</sup> /taurocholate cotransporting polypeptide | Basolateral transporter of bile acids of hepatocytes                                                                        |
|                 | <i>SULT2A1</i>                | Sulfotransferase 2A1                                     | Metabolism of drugs and endogenous compounds, including bile acids                                                          |
|                 | <i>UGT2B4</i>                 | UDP glucuronosyltransferase 2B4                          | Metabolism of drugs, xenobiotics and endogenous compounds                                                                   |
| 5               | <i>AMPD3</i>                  | Adenosine monophosphate deaminase 3                      | Energy metabolism and inflammation                                                                                          |
|                 | <i>ADGRG1</i>                 | Adhesion G protein-coupled receptor G1                   | Collagen binding, cell adhesion and cell-cell interactions                                                                  |
|                 | <i>BCL2L1</i>                 | BCL2 like 1                                              | Apoptosis                                                                                                                   |
|                 | <i>CHI3L1</i>                 | Chitinase 3 like 1                                       | Inflammation and tissue remodeling and apoptosis                                                                            |
|                 | <i>CTTN</i>                   | Cortactin                                                | Organization of actin cytoskeleton and cell shape                                                                           |
|                 | <i>CXCL8</i>                  | C-X-C motif chemokine ligand 8                           | Inflammation                                                                                                                |
|                 | <i>IER3</i>                   | Immediate early response 3                               | Apoptosis                                                                                                                   |
|                 | <i>IFI16</i>                  | Interferon $\gamma$ inducible protein 16                 | Inflammation                                                                                                                |
|                 | <i>IFI27</i>                  | Interferon $\alpha$ inducible protein 27                 | Apoptosis and inflammation                                                                                                  |
|                 | <i>IGFBP1</i>                 | Insulin like growth factor binding protein 1             | Cell migration/metabolism, unfolded protein response and glucose metabolism                                                 |
|                 | <i>IL6</i>                    | Interleukin 6                                            | Inflammation                                                                                                                |
|                 | <i>KYNU</i>                   | Kynureninase                                             | Metabolism of amino acids and derivatives                                                                                   |
|                 | <i>LDLR</i>                   | Low density lipoprotein receptor                         | Lipid digestion, mobilization and transport                                                                                 |
|                 | <i>LY96</i>                   | Lymphocyte antigen 96                                    | Inflammation and apoptosis                                                                                                  |
|                 | <i>MLKL</i>                   | Mixed lineage kinase domain like pseudokinase            | Necroptosis                                                                                                                 |

Table 2. Cont.

| Figure Number * | Gene Abbreviation     | Gene Name                                                           | Relevant Associated Biological Pathways/Functions                                                           |
|-----------------|-----------------------|---------------------------------------------------------------------|-------------------------------------------------------------------------------------------------------------|
| 5               | <i>PPP1R3C</i>        | Protein phosphatase 1 regulatory 3C                                 | Glucose metabolism                                                                                          |
|                 | <i>SDC2</i>           | Syndecan 2                                                          | Cytoskeletal organization and cell-matrix interactions                                                      |
|                 | <i>SLCO1B3</i>        | Solute carrier organic anion transporter 1B3                        | Bile acid and bilirubin transport                                                                           |
|                 | <i>TFPI</i>           | Tissue factor pathway inhibitor                                     | Collagen chain trimerization, formation of fibrin clot and hemostasis                                       |
|                 | <i>TNFRSF10A</i>      | Tumor necrosis factor superfamily 10A                               | Apoptosis                                                                                                   |
| 6a              | <i>MLXIPL/CHR EBP</i> | MLX interacting protein like                                        | Regulator of triglyceride synthesis genes                                                                   |
|                 | <i>SREBP1c</i>        | Sterol regulatory element binding transcription factor 1, isoform c | Regulator of sterol biosynthesis genes                                                                      |
|                 | <i>FASN</i>           | Fatty acid synthase                                                 | Fatty acid biosynthesis                                                                                     |
|                 | <i>SCD</i>            | Stearoyl-CoA desaturase                                             | Fatty acid biosynthesis                                                                                     |
|                 | <i>ACOX1</i>          | Acyl-CoA oxidase 1                                                  | Fatty acid $\beta$ -oxidation pathway                                                                       |
|                 | <i>CD36</i>           | Cluster determinant 36 molecule                                     | Transport of fatty acids                                                                                    |
| 6b              | <i>ACTA2</i>          | Actin $\alpha 2$                                                    | Vascular contractility                                                                                      |
|                 | <i>ADAMTS2</i>        | ADAM metalloproteinase with thrombospondin type 1 motif 2           | Excision of fibrillar procollagens                                                                          |
|                 | <i>CDH11</i>          | Cadherin 11                                                         | Cell adhesion                                                                                               |
|                 | <i>COL14A1</i>        | Collagen type XIV $\alpha 1$ chain                                  | Adhesion of collagen bundles, regulation of fibrillogenesis and collagen chain trimerization                |
|                 | <i>COL15A1</i>        | Collagen type XV $\alpha 1$ chain                                   | Adhere basement membranes to underlying connective tissue stroma and collagen chain trimerization           |
|                 | <i>COL1A1</i>         | Collagen type I $\alpha 1$ chain                                    | Fibril-forming collagen                                                                                     |
|                 | <i>COL1A2</i>         | Collagen type I $\alpha 2$ chain                                    | Fibril-forming collagen                                                                                     |
|                 | <i>COL3A1</i>         | Collagen type III $\alpha 1$ chain                                  | Fibril-forming collagen                                                                                     |
|                 | <i>COL4A1</i>         | Collagen type IV $\alpha 1$ chain                                   | Collagen chain trimerization                                                                                |
|                 | <i>COL4A2</i>         | Collagen type IV $\alpha 2$ chain                                   | Collagen chain trimerization                                                                                |
|                 | <i>COL4A3</i>         | Collagen type IV $\alpha 3$ chain                                   | Collagen chain trimerization                                                                                |
|                 | <i>COL4A4</i>         | Collagen type IV $\alpha 4$ chain                                   | Collagen chain trimerization                                                                                |
|                 | <i>COL5A1</i>         | Collagen type V $\alpha 1$ chain                                    | Assembly of heterotypic fibers composed of both type I and type V collagen and collagen chain trimerization |
|                 | <i>COL5A2</i>         | Collagen type V $\alpha 2$ chain                                    | Assembly of heterotypic fibers composed of both type I and type V collagen and collagen chain trimerization |
|                 | <i>COL6A3</i>         | Collagen type VI $\alpha 3$ chain                                   | Bind extracellular matrix proteins and collagen chain trimerization                                         |
|                 | <i>CTGF</i>           | Cellular communication network factor 2                             | Cell adhesion and chondrocyte proliferation and differentiation                                             |
|                 | <i>CTSK</i>           | Cathepsin K                                                         | Extracellular matrix degradation, fibrinogen endoprotease activity                                          |
|                 | <i>DCN</i>            | Decorin                                                             | Collagen fibril assembly                                                                                    |

Table S2. Cont.

| Figure Number * | Gene Abbreviation               | Gene Name                              | Relevant Associated Biological Pathways/Functions                    |
|-----------------|---------------------------------|----------------------------------------|----------------------------------------------------------------------|
| 6b              | <i>FBN1</i>                     | Fibrilin 1                             | Structural component of microfibrils of the extracellular matrix     |
|                 | <i>ITGB8</i>                    | Integrin $\beta$ 8                     | Mediate cell-cell and cell-extracellular matrix interactions         |
|                 | <i>MMP1</i>                     | Matrix metalloproteinase 1             | Degradation of extracellular matrix                                  |
|                 | <i>PCOLCE2</i>                  | Procollagen C-endopeptidase enhancer 2 | Degradation of extracellular matrix and collagen chain trimerization |
|                 | <i>PPP1R3C</i>                  | Protein phosphatase 1 regulatory 3C    | Glycogen biosynthesis and cyclic AMP-dependent protein kinase A      |
|                 | <i>SPP1</i>                     | Secreted phosphoprotein 1              | Degradation of extracellular matrix and cell-matrix interactions     |
|                 | <i>TGF <math>\beta</math> 1</i> | Transforming growth factor $\beta$ 1   | Stimulation of collagen production                                   |
|                 | <i>TGF <math>\beta</math> 2</i> | Transforming growth factor $\beta$ 2   | Extracellular matrix organization                                    |
|                 | <i>THBS2</i>                    | Thrombospondin 2                       | Mediate cell-to-cell and cell-to-matrix interactions                 |
|                 | <i>VCAN</i>                     | Versican                               | Cell adhesion and tissue morphogenesis and maintenance               |
|                 | <i>VWF</i>                      | Von Willebrand factor                  | Coagulation, hemostasis and adhesion of platelets                    |

\* in the main manuscript. Information collected from Uniport.org, Genecards.org, Reactome.org and <https://www.ncbi.nlm.nih.gov/biosystems>.

## References

1. Bell, C.C.; Hendriks, D.F.; Moro, S.M.; Ellis, E.; Walsh, J.; Renblom, A.; Fredriksson Puigvert, L.; Dankers, A.C.; Jacobs, F.; Snoeys, J.; et al. Characterization of primary human hepatocyte spheroids as a model system for drug-induced liver injury, liver function and disease. *Sci. Rep.* **2016**, *6*, 25187.
2. Tostões, R.M.; Leite, S.B.; Serra, M.; Jensen, J.; Björquist, P.; Carrondo, M.J.; Brito, C.; Alves, P.M. Human liver cell spheroids in extended perfusion bioreactor culture for repeated-dose drug testing. *Hepatology* **2012**, *55*, 1227–1236.
